# Supplementary material
Source: PubMed Central journal article supplement (PMC5369456)
Supplement: flgastro-2014-100548-s1.pdf [file flgastro-2014-100548-s1.pdf]

**\*1. What is your job role?**

- IBD Nurse specialist
- Gastroenterology nurse specialist
- Consultant gastroenterologist
- Specialist registrar in gastroenterology

Other (please specify)

**\*2. What city/ country do you work?**

**\*3. In your opinion, do you think having IBD would limit a patient travelling abroad?**

- yes
- no

**\*4. please answer the following statement:**

**I feel confident that I can give patients factual and trustworthy information about travelling with IBD**

- Strongly agree
- Agree
- Disagree
- Strongly disagree

**\*5. What aspects of travel advice do you feel LESS confident to give to patients?**

- Country specific travel advice
- Vaccination advice for travel destinations
- Details of IBD centres/ doctors in different countries
- Avoiding travellers diarrhoea
- Insurance companies that insure IBD
- i feel confident to give accurate advice on all aspects of travelling with IBD

Other (please specify)

**\*6. If IBD patients are seeking travel advice, what do you generally do:**

- Refer to family doctor
- Refer to travel clinic
- Refer to internet source
- Give patients the information myself
- Nothing, i do not feel confident giving them accurate advice

Other (please specify)

**\*7. If there was a website available containing evidence –based travel information specific to IBD, would you find this useful?**

- yes
- No

**\*8. would you find it useful to have a facility where you could search and refer to IBD centres globally (E.g. if patients with IBD move overseas or wish to travel whilst on infliximab)**

- yes
- No

please comment

**\*9. In your country/ city, do you have any online facility or smart phone app that enables patients to search for toilet facilities near to them?**

- yes
- no

If yes, please supply details and web-link if possible

**10. We are in the process of designing a one-stop IBD travel advice website for patients and health care professionals. If you would like to be sent a link to this once completed, please provide your e-mail below.**
